# Supplementary material for: Outdoor Activity in the Daytime, but Not the Nighttime, Predicts Better Mental Health Status During the COVID-19 Curfew in the United Arab Emirates
Source: Frontiers journal article supplement (doi:10.3389/fpubh.2022.829362), 2022-04-04
Supplement: Table_1.pdf [file Table_1.pdf]

Supplementary Table 1. Timeline of Control and Prevention Measures during COVID-19 Lockdown in the UAE

| <b>Date</b> | <b>Emirate</b> | <b>Control and Prevention Measures</b>                               |
|-------------|----------------|----------------------------------------------------------------------|
| Mar 8       | UAE            | Closure of nurseries, schools and universities                       |
| Mar 14      | Abu Dhabi      | Enactment of remote working for non-key workers                      |
| Mar 17      | UAE            | Closure of religious worship venues (mosques/churches)               |
| Mar 21      | UAE            | Closure of recreational spaces (i.e., beach, parks)                  |
| Mar 22      | Dubai          | Social distancing in retail outlets (1.5 m)                          |
| Mar 24      | UAE            | Closure of all malls and non-essential retail                        |
| Mar 25      | UAE            | Grounding of flights                                                 |
| Mar 26      | UAE            | 3- day disinfection program and night curfew                         |
| Mar 28      | Abu Dhabi      | First testing center opens                                           |
| Apr 5       | Dubai          | Enactment of movement permit requirements                            |
| Apr 7       | Dubai          | First drive-through testing center open                              |
| Apr 9       | UAE            | 13 drive-through testing centers open                                |
| Apr 9       | UAE            | Places of worship to stay closed as Ramadan approaches               |
| Apr 12      | UAE            | Home testing program for people of determination (special needs)     |
| Apr 16      | Dubai          | Field hospital with capacity to treat 3,000 COVID-19 patients opened |
| Apr 28      | Abu Dhabi      | Mandatory COVID-19 test for mall employees before reopening          |
